# Supplementary material for: Antarctic subglacial lakes drain through sediment-floored canals: theory and model testing on real and idealized domains
Source: Copernicus journal article supplement (doi:10.5194/tc-11-381-2017), 2017-02-02
Supplement: Supplementary file 1 [file tc-11-381-2017-supplement.zip]

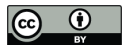

## *Supplement of*

# **Antarctic subglacial lakes drain through sediment-floored canals: theory and model testing on real and idealized domains**

**Sasha P. Carter et al.**

*Correspondence to:* Sasha P. Carter (sasha.ase.carter@gmail.com)

- tc-11-381-2017-supplement-title-page.pdf
- \_\_MACOSX
  - macismod
    - \* .\_README.txt
    - \* .\_filling\_flood\_mod3\_SLWWA.m
    - \* .\_filling\_flood\_mod4U\_tM.m
    - \* .\_filling\_flood\_mod6UH.m
    - \* .\_gttrack.m
    - \* .\_isfucked.m
    - \* .\_overhead52.m
    - \* .\_rmrept.m
    - \* .\_tc2016\_74y.mat
    - \* .\_webcolor100.txt
- macismod
  - README.txt
  - filling\_flood\_mod3\_SLWWA.m
  - filling\_flood\_mod4U\_tM.m
  - filling\_flood\_mod6UH.m
  - gttrack.m
  - isfucked.m
  - overhead52.m
  - rmrept.m
  - tc2016\_74y.mat
  - webcolor100.txt

The copyright of individual parts of the supplement might differ from the CC-BY 3.0 licence.
